# Supplementary material for: Cognitive outcomes following unilateral magnetic resonance–guided focused ultrasound thalamotomy for essential tremor: findings from two cohorts
Source: PubMed Central journal article supplement (PMC11406546; doi:10.1093/braincomms/fcae293), 2024-08-30
Supplement: fcae293_supplementary_data.pdf [file fcae293_supplementary_data.pdf]

**Supplementary Material**

**Table of Contents**

**Supplementary Table 1. Measures across cohorts ..... 2**

**Supplemental Table 2. Cognition and tremor severity across time in the Toronto cohort..... 3**

**Supplemental Table 3: Cognition and tremor severity across time within the West Virginia University School of Medicine – Rockefeller  
Neuroscience Institute cohort ..... 4**

**Scripts..... 5**

**References ..... 6**

Supplementary Table 1. Measures across cohorts

| Domain                       | Ability                               | Toronto Cohort Measures                                                      | WVU-RNI Cohort Measures              |
|------------------------------|---------------------------------------|------------------------------------------------------------------------------|--------------------------------------|
| Tremor severity              | --                                    | CRST (1) – Parts A and B of the hand contralateral to the treated hemisphere | CRST – Total Score                   |
| Attention and working memory | Basic auditory attention              | WAIS-IV (2) – Digit Span Forward                                             | WAIS-IV – Digit Span Forward         |
|                              | Working memory – digits reverse       | WAIS-IV – Digit Span Backward                                                | WAIS-IV – Digit Span Backward        |
|                              | Working memory – digits sequencing    | WAIS-IV – Digit Span Sequencing                                              | WAIS-IV – Digit Span Sequencing      |
| Processing speed             | Oral symbol-digit substitution        | SDMT (3) – Oral                                                              | SDMT – Oral                          |
|                              | Visual scanning and sequencing        | --                                                                           | Trail Making Test (4) – Part A       |
|                              | Word reading                          | D-KEFS (5) – CWIT – Word Reading                                             | SCWT (6) – Word                      |
|                              | Color naming                          | D-KEFS – CWIT – Color Naming                                                 | SCWT – Color                         |
| Executive function           | Response inhibition                   | D-KEFS – CWIT – Inhibition                                                   | SCWT – Color-Word                    |
|                              | Response inhibition with set shifting | D-KEFS – CWIT – Inhibition/ Switching                                        | --                                   |
|                              | Abstract reasoning                    | --                                                                           | WAIS-IV – Matrix Reasoning           |
|                              | Cognitive flexibility                 | --                                                                           | Trail Making Test – Part B           |
| Language                     | Confrontation naming                  | Boston Naming Test (7)                                                       | --                                   |
|                              | Phonemic fluency                      | FAS (baseline) and BHR (follow-up)                                           | FAS                                  |
|                              | Semantic fluency                      | Animals                                                                      | Animals                              |
| Learning and memory          | List learning                         | HVLT-R (8) – Total Recall                                                    | CVLT-II (9) – Trials 1-5 Free Recall |
|                              | List retrieval                        | HVLT-R – Delayed Recall                                                      | CVLT-II – Long Delay Free Recall     |
|                              | List recognition                      | HVLT-R – Recognition Discrimination Index                                    | CVLT-II – Discriminability           |
|                              | Story learning                        | --                                                                           | WMS-IV (10) – Logical Memory I       |
|                              | Story retrieval                       | --                                                                           | WMS-IV – Logical Memory II           |

- *Abbreviations:* CRST, Clinical Rating Scale for Tremor; CVLT-II, California Verbal Learning Test, Second Edition; CWIT, Color-Word Interference Test; D-KEFS, Delis-Kaplan Executive Function System; HVLT-R, Hopkins Verbal Learning Test-Revised; SCWT, Stroop Color-Word Test; SDMT, Symbol Digit Modalities Test; WAIS-IV, Wechsler Adult Intelligence Scale, Fourth Edition; WMS-IV, Wechsler Memory Scale, Fourth Edition.
- All cognitive test scores were age-corrected and standardized using test-specific normative samples. All language measures and scores from TMT were additionally corrected for race and education using available normative reference groups.(11)
- Toronto patients were administered HVLT-R Form 1 at baseline and Form 4 at follow-up.
- WVU-RNI patients were administered either the CVLT-II standard form ( $N = 5$  at baseline), alternate form ( $N = 5$  at follow-up), or short form ( $N=17$  at both baseline and follow-up).
- WVU-RNI patients received either the WMS-IV adult ( $N = 4$ ) or older adult ( $N = 18$ ) version, depending on age.
- SDMT scores from 4 Toronto patients and 6 WVU-RNI patients were excluded from analyses due to their age exceeding that of available normative data.

Supplemental Table 2. Cognition and tremor severity across time in the Toronto cohort

| Domain                       | Ability                              | <i>N</i> | Baseline |           | Follow-up |           | Test Statistic        | <i>p</i> <sub>corr</sub> | Effect Size      |
|------------------------------|--------------------------------------|----------|----------|-----------|-----------|-----------|-----------------------|--------------------------|------------------|
|                              |                                      |          | <i>M</i> | <i>SD</i> | <i>M</i>  | <i>SD</i> |                       |                          |                  |
| Tremor severity              | --                                   | 33       | 16.12    | 5.31      | 7.91      | 5.22      | <i>Z</i> = -4.69      | <0.001*                  | <i>r</i> = -0.82 |
| Attention and working memory | Basic auditory attention             | 32       | 0.33     | 1.09      | 0.10      | 1.07      | <i>Z</i> = -1.54      | 0.46                     | <i>r</i> = -0.27 |
|                              | Working memory – digits reverse      | 32       | -0.13    | 1.10      | -0.07     | 1.00      | <i>Z</i> = -0.66      | 0.76                     | <i>r</i> = -0.12 |
|                              | Working memory – digits sequencing   | 28       | 0.20     | 0.95      | 0.01      | 0.84      | <i>t</i> (27) = 1.67  | 0.46                     | <i>d</i> = 0.32  |
| Processing speed             | Oral symbol-digit substitution       | 28       | -0.49    | 1.06      | -0.48     | 1.06      | <i>Z</i> = -0.31      | 0.87                     | <i>r</i> = -0.06 |
|                              | Word reading                         | 32       | -0.21    | 1.19      | -0.09     | 0.99      | <i>Z</i> = -0.61      | 0.76                     | <i>r</i> = -0.11 |
|                              | Color naming                         | 31       | -0.29    | 1.34      | -0.22     | 1.24      | <i>Z</i> = -1.17      | 0.60                     | <i>r</i> = -0.21 |
| Executive function           | Response inhibition                  | 32       | 0.63     | 1.18      | 0.14      | 1.17      | <i>Z</i> = -0.59      | 0.75                     | <i>r</i> = -0.10 |
|                              | Response inhibition and set shifting | 32       | 0.09     | 1.16      | 0.19      | 1.09      | <i>t</i> (31) = -0.83 | 0.61                     | <i>d</i> = -0.15 |
| Language                     | Confrontation naming                 | 25       | 0.14     | 1.47      | 0.42      | 1.19      | <i>Z</i> = -3.16      | 0.02*                    | <i>r</i> = -0.63 |
|                              | Phonemic fluency                     | 31       | 0.01     | 1.39      | -0.03     | 1.28      | <i>Z</i> = -0.32      | 0.76                     | <i>r</i> = -0.06 |
|                              | Semantic fluency                     | 30       | 0.25     | 1.41      | 0.27      | 1.31      | <i>Z</i> = -0.14      | 0.89                     | <i>r</i> = -0.01 |
| Learning and memory          | List learning                        | 33       | -0.81    | 1.12      | -0.81     | 1.15      | <i>t</i> (32) = 0.02  | 0.89                     | <i>d</i> = -0.01 |
|                              | List retrieval                       | 33       | -0.81    | 1.14      | -0.63     | 1.19      | <i>Z</i> = -1.35      | 0.53                     | <i>r</i> = -0.24 |
|                              | List recognition                     | 33       | -0.65    | 1.33      | -0.78     | 1.27      | <i>Z</i> = -1.07      | 0.87                     | <i>r</i> = -0.19 |

\*Significant difference detected between baseline and follow-up in confrontation naming (*p*<sub>corr</sub> = 0.02) and tremor severity (*p* < 0.001), such that performance on confrontation naming and tremor severity improved.

Supplemental Table 3: Cognition and tremor severity across time within the West Virginia University School of Medicine – Rockefeller Neuroscience Institute cohort

| Domain                       | Ability                            | N  | Baseline |       | Follow-up |       | Test Statistic  | $p_{\text{corr}}$ | Effect Size |
|------------------------------|------------------------------------|----|----------|-------|-----------|-------|-----------------|-------------------|-------------|
|                              |                                    |    | M        | SD    | M         | SD    |                 |                   |             |
| Tremor severity              | --                                 | 19 | 48.65    | 14.69 | 22.21     | 11.23 | $Z = -3.62$     | <0.001*           | $r = -0.62$ |
| Attention and working memory | Basic auditory attention           | 22 | -0.12    | 0.85  | -0.11     | 0.76  | $t(21) = -0.12$ | 0.96              | $d = -0.03$ |
|                              | Working memory – digits reverse    | 22 | -0.39    | 0.72  | -0.18     | 0.91  | $t(21) = -1.23$ | 0.69              | $d = -0.26$ |
|                              | Working memory – digits sequencing | 22 | 0.15     | 0.79  | 0.02      | 1.04  | $Z = -0.75$     | 0.87              | $r = -0.11$ |
| Processing speed             | Oral symbol-digit substitution     | 15 | -1.40    | 0.86  | -1.20     | 0.96  | $t(15) = -1.49$ | 0.60              | $d = -0.39$ |
|                              | Visual scanning and sequencing     | 19 | -0.78    | 1.02  | -0.78     | 0.91  | $t(19) = 0.03$  | 0.60              | $d = 0.01$  |
|                              | Word reading                       | 18 | -1.83    | 1.21  | -1.81     | 1.10  | $t(17) = -0.17$ | 0.98              | $d = -0.04$ |
|                              | Color naming                       | 18 | -1.77    | 0.93  | -1.82     | 1.16  | $t(17) = 0.40$  | 0.87              | $d = 0.09$  |
| Executive function           | Abstract reasoning                 | 17 | -0.22    | 0.91  | -0.12     | 1.08  | $Z = -0.23$     | 0.96              | $r = -0.04$ |
|                              | Response inhibition                | 18 | -0.93    | 0.85  | -0.93     | 1.02  | $t(17) = -0.05$ | 0.96              | $d = -0.01$ |
|                              | Cognitive flexibility              | 19 | -0.96    | 1.39  | -1.07     | 1.24  | $t(18) = 0.62$  | 0.94              | $d = 0.14$  |
| Language                     | Confrontation naming               | 6  | 0.33     | 0.60  | 0.47      | 0.84  | $t(5) = -0.60$  | 0.58              | $d = 0.24$  |
|                              | Phonemic fluency                   | 22 | -0.98    | 0.82  | -1.05     | 0.83  | $t(21) = 0.40$  | 0.94              | $d = 0.09$  |
|                              | Semantic fluency                   | 22 | -0.51    | 0.79  | -0.63     | 0.98  | $t(21) = 0.60$  | 0.96              | $d = 0.13$  |
| Learning and memory          | List learning                      | 22 | -0.16    | 0.88  | -0.15     | 1.23  | $t(21) = -0.06$ | 0.96              | $d = -0.01$ |
|                              | List retrieval                     | 22 | -0.36    | 1.06  | 0.21      | 1.13  | $t(21) = -2.91$ | 0.08              | $d = -0.62$ |
|                              | List recognition                   | 22 | 0.02     | 0.70  | 0.14      | 0.82  | $Z = -0.93$     | 0.81              | $r = -0.14$ |
|                              | Story learning                     | 19 | -0.12    | 0.88  | 0.09      | 0.74  | $t(18) = -1.39$ | 0.60              | $d = -0.32$ |
|                              | Story retrieval                    | 19 | -0.32    | 0.98  | 0.16      | 0.56  | $t(18) = -2.96$ | 0.08              | $d = -0.68$ |

\*Significant difference detected between baseline and follow-up tremor severity ( $p < 0.001$ ), such that tremor severity improved postoperatively

## Scripts

Scripts for plotting and RCI analyses can be found here: <https://shorturl.at/qQ2HZ>

## References

1. Fahn S, Tolosa E, Marín C. Clinical rating scale for tremor. *Parkinson's disease and movement disorders*. 1993;2:271-80.
2. Wechsler D. Wechsler adult intelligence scale—Fourth Edition (WAIS—IV). San Antonio, TX: NCS Pearson. 2008;22(498):1.
3. Smith A. Symbol digit modalities test: Western psychological services Los Angeles; 1973.
4. Reitan R. Trail making test: Manual for administration and scoring: Reitan Neuropsychology Laboratory. Back to cited text. 1992(48).
5. Delis DC, Kaplan E, Kramer JH. Delis-Kaplan executive function system. 2001.
6. Golden CJ, Freshwater SM. Stroop color and word test. 1978.
7. Kaplan E, Goodglass H, Weintraub S. Boston naming test. 2001.
8. Shapiro AM, Benedict RH, Schretlen D, Brandt J. Construct and concurrent validity of the Hopkins Verbal Learning Test—revised. *The Clinical Neuropsychologist*. 1999;13(3):348-58.
9. Delis DC, Kramer JH, Kaplan E, Ober BA. California Verbal Learning Test. Assessment. 1987.
10. Drozdick LW, Raiford SE, Wahlstrom D, Weiss LG. The Wechsler Adult Intelligence Scale—Fourth Edition and the Wechsler Memory Scale—Fourth Edition. 2018.
11. Heaton RK. Revised comprehensive norms for an expanded Halstead-Reitan Battery: Demographically adjusted neuropsychological norms for African American and Caucasian adults, professional manual: Psychological Assessment Resources; 2004.
